# Supplementary material for: Functional Characterization of ShK Domain-Containing Protein in the Plant-Parasitic Nematode Bursaphelenchus xylophilus
Source: MDPI journal article supplement (doi:10.3390/plants13030404), 2024-01-30
Supplement: s1 [file s1]

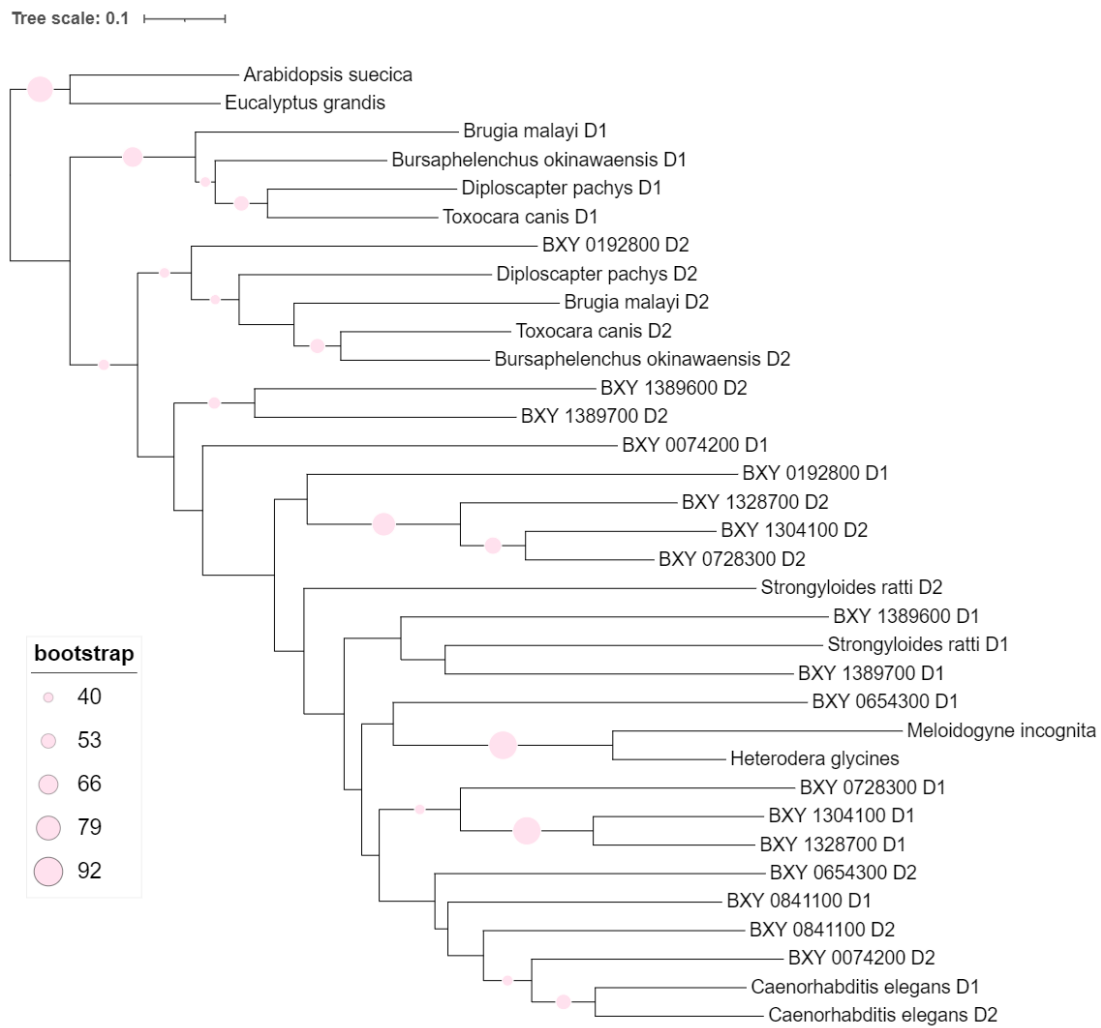

**Figure S1:** Neighbor-joining (NJ) phylogeny tree that represents the protein sequence similarity between of the nine candidate genes potential specific *B. xylophilus* predicted ShK domain-containing proteins and other organisms, such as plant-parasitic, animal-parasitic and free-living nematodes and plants also ShK domain-containing proteins with domain D1 and domain D2.
